# Supplementary material for: A facile synthesis of molybdenum carbide nanoparticles-modified carbonized cotton textile as an anode material for high-performance microbial fuel cells
Source: Royal Society of Chemistry journal article supplement (doi:10.1039/c8ra07502f), 2018-01-01
Supplement: c8ra07502f1.pdf [file c8ra07502f1.pdf]

## Supplementary information

### **A facile synthesis of molybdenum carbide nanoparticles-modified carbonized cotton textile as anode material for high-performance microbial fuel cell**

Lizhen Zeng,<sup>a,c</sup> Shaofei Zhao,<sup>b</sup> Lixia Zhang<sup>d</sup> and Miao He<sup>\*a</sup>

---

<sup>a</sup> *School of Physics and Optoelectronic Engineering, Guangdong University of Technology, Guangzhou 510006, China. E-mail: herofategdut@126.com*

<sup>b</sup> *School of Chemical Engineering and Light Industry, Guangdong University of Technology, Guangzhou 510006, China*

<sup>c</sup> *Analysis and testing center, South China Normal University, Guangzhou 510006, China*

<sup>d</sup> *CAS Key Laboratory of Environmental and Applied Microbiology, Environmental Microbiology Key Laboratory of Sichuan Province, Chengdu Institute of Biology, Chinese Academy of Sciences, Chengdu 610041, China*

Figures:

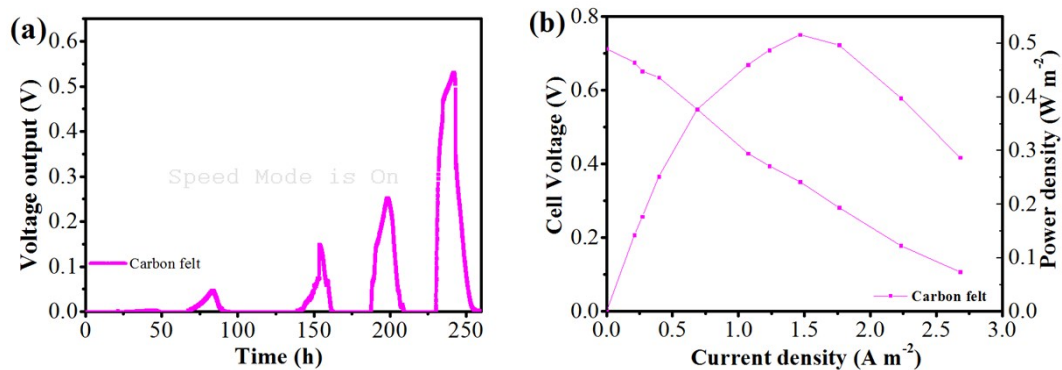

Fig. S1 Voltage output versus time during start-up of the MFCs with carbon anode with 1000  $\Omega$  resistance loading (a); Polarization curve and power output of carbon anode in the MFCs (b).

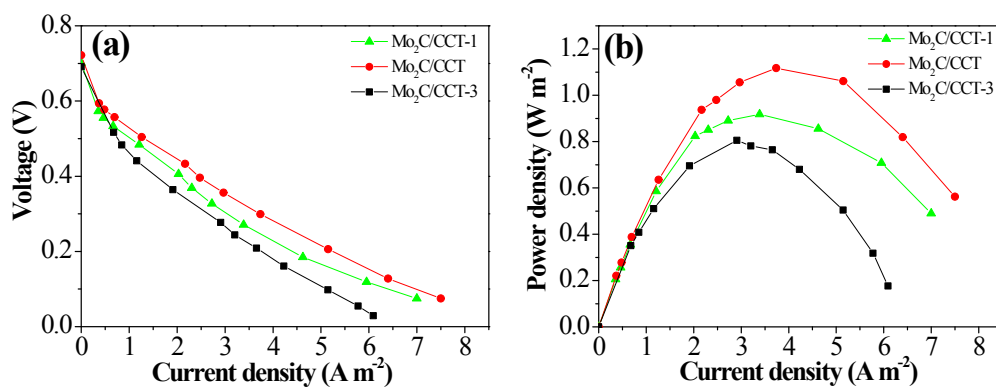

Fig. S2 Polarization curves (a) and Power outputs (b) of different amount Mo<sub>2</sub>C/CCT anodes in the MFCs.

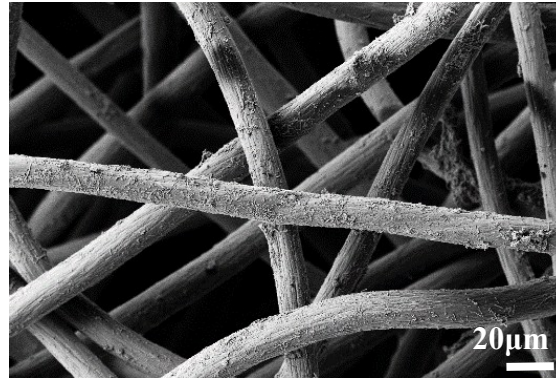

Fig. S3 SEM images of the electroactive biofilm grown on the CF anode after 2-months of operation.

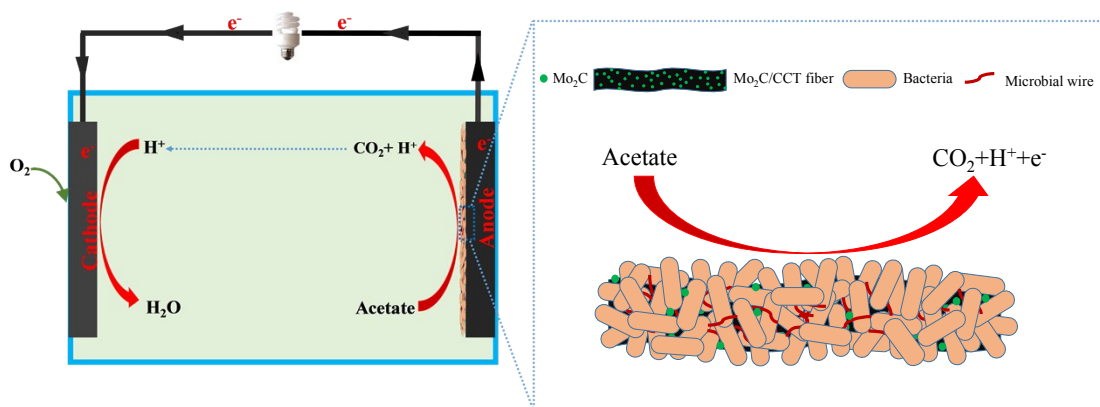

Fig. S4 Illustration of electron transfer process from Mo<sub>2</sub>C/CCT biofilm in the Mo<sub>2</sub>C/CCT of an MFC.

Table:

Tab.S1 Summary of performance of MFCs with different anode materials in the literatures

| anode                       | Inoculum      | $P_{\max}$ (mW m <sup>-2</sup> ) | Reference |
|-----------------------------|---------------|----------------------------------|-----------|
| CSE                         | Mixed culture | 759 ± 38                         | [4]       |
| thornless CSE               | Mixed culture | 425 ± 21                         | [4]       |
| brush                       | Mixed culture | 830 ± 42                         | [4]       |
| NC@CCT                      | Mixed culture | 931 ± 61                         | [8]       |
| LSC                         | Mixed culture | 701 ± 44                         | [24]      |
| NCP/LSC                     | Mixed culture | 1090 ± 72                        | [24]      |
| graphite plate              | Mixed culture | 383 ± 21                         | [24]      |
| reticulated vitreous carbon | Mixed culture | 650 ± 33                         | [24]      |
| graphene-coated sponge      | Mixed culture | 612 ± 39                         | [24]      |
| GL/GP-15                    | Mixed culture | 670 ± 34                         | [32]      |
